# Supplementary material
Source: MDPI journal article supplement (https://www.mdpi.com/2071-1050/13/13/7088)
Supplement: s1 [file s1]

**Table S1.** Comparison of average TP soil analyses results between activity areas in the Upper Xingu (Central Amazonia)(Modified from [31]).

| Area                   | n   | pH  | OC (g kg <sup>-1</sup> ) | P (mg kg <sup>-1</sup> ) |
|------------------------|-----|-----|--------------------------|--------------------------|
| Forest                 | 26  | 4   | 35                       | 1077                     |
| Fallow <sup>a</sup>    | 69  | 4,9 | 20,8                     | 416                      |
| Mid-Plaza <sup>a</sup> | 44  | 4,6 | 8,2                      | 401                      |
| Plaza <sup>a</sup>     | 59  | 4,8 | 9                        | 608                      |
| House <sup>a</sup>     | 314 | 5,5 | 10                       | 672                      |
| Hearth <sup>a</sup>    | 24  | 7   | 7,6                      | 707                      |
| Manioc <sup>a</sup>    | 39  | 6,1 | 11,8                     | 700                      |
| Midden <sup>a</sup>    | 23  | 6,7 | 28,3                     | 3617                     |
| Midden <sup>b</sup>    | 29  | 5,9 | 27,6                     | 2814                     |
| Domestic <sup>c</sup>  | 232 | 5,7 | 12,4                     | 830                      |
| Feature <sup>c</sup>   | 31  | 6,3 | 16,4                     | 1605                     |
| Midden <sup>c</sup>    | 42  | 5,9 | 19,3                     | 1141                     |

<sup>a</sup> Current Kuikuro Village. “Manioc” refers to a manioc processing area.

<sup>b</sup> Historical villages.

<sup>c</sup> Prehistoric site Nokugu.
