# Supplementary material
Source: MDPI journal article supplement (https://www.mdpi.com/2071-1050/13/13/7088)

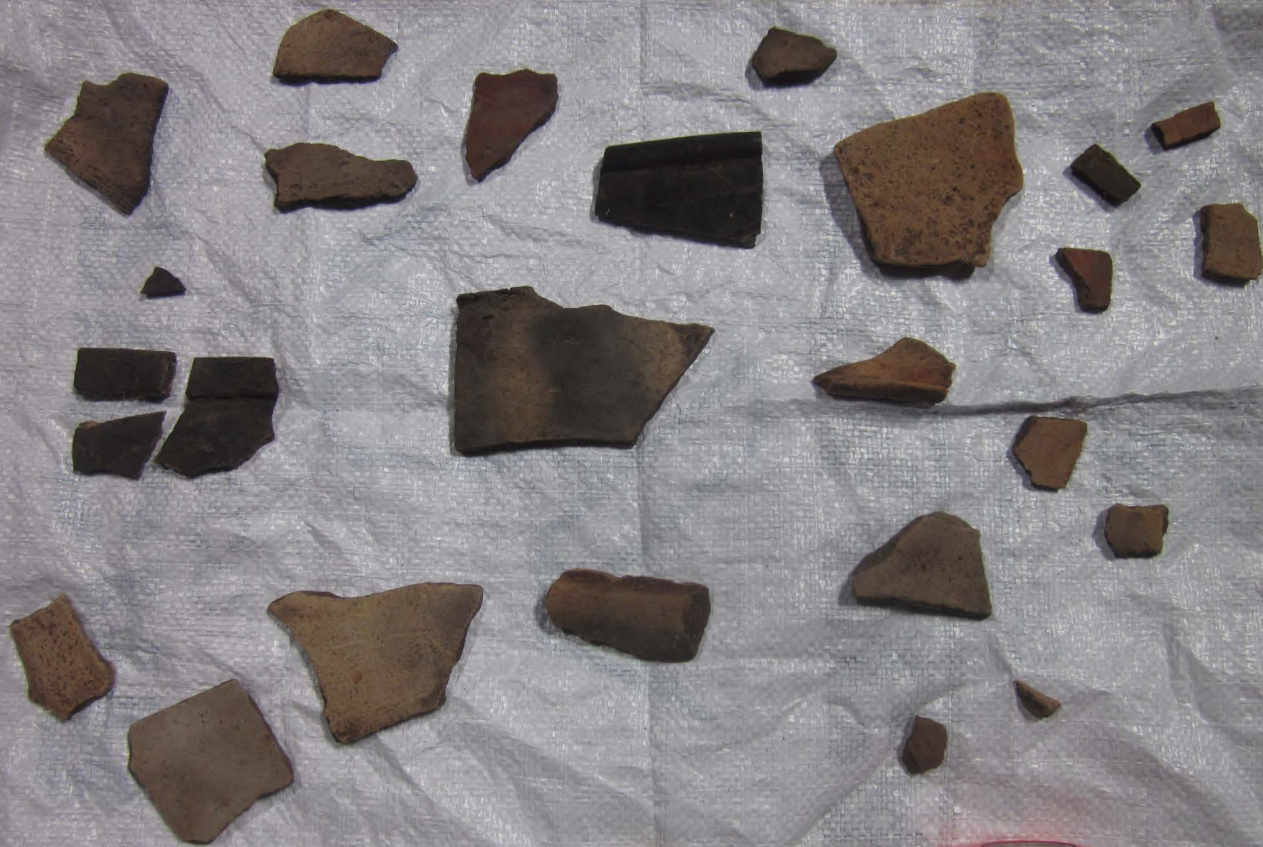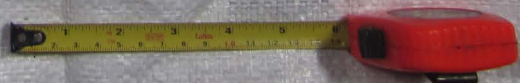

Supplement: s1 [file s1]

# AS-N with 95% CI

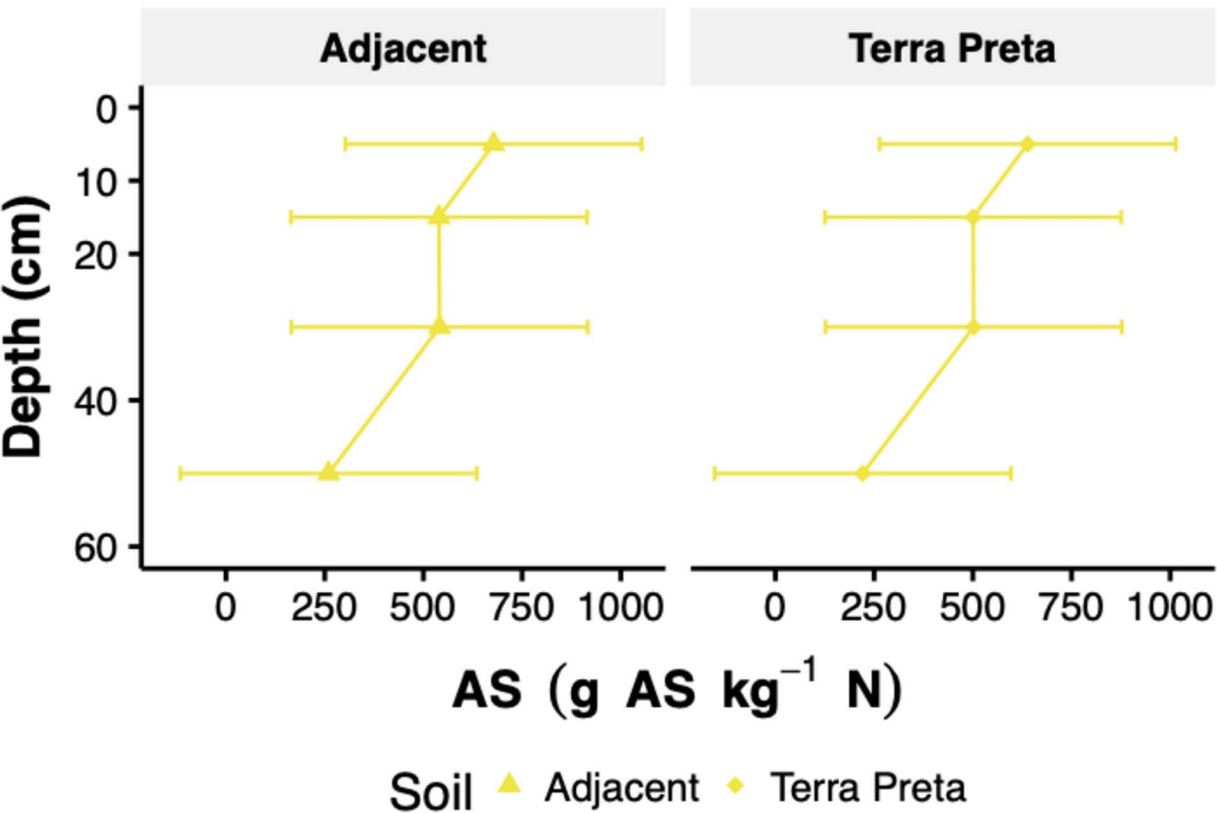

Supplement: s1 [file s1]
